# Supplementary material for: 25-Hydroxylase vitamin D deficiency in 27 Saudi Arabian subjects: a clinical and molecular report on CYP2R1 mutations
Source: PubMed Central journal article supplement — Endocr Connect. 2021 Jun 16;10(7):767–75. doi: 10.1530/EC-21-0102 (PMC8346186; doi:10.1530/ec-21-0102), 2021-06-16
Supplement: supplementary_table_1.pdf [file supplementary_table_1.pdf]

**Supplementary Table 1.** Primer sequences for *CYP2R1* gene sequencing.

| <b>Gene</b><br><i>CYP2R1</i> | <b>Forward primer sequence (5'-3')</b> | <b>Reverse primer sequence (5'-3')</b> | <b>Product size</b> | <b>Annealing Temperature (°C)</b> |
|------------------------------|----------------------------------------|----------------------------------------|---------------------|-----------------------------------|
| Exon 1                       | GCCTTATAGAAGGAGGGCAC                   | AAAATAATCCCAACTGTATGCAC                | 405 bp              | 62 °C                             |
| Exon 2a                      | AATTTGGAGAAGGATGACTAACC                | ACAGCTGCATTTCTAACAGC                   | 494 bp              | 63 °C                             |
| Exon 2b                      | TGAAGACACCGATTTTCAGC                   | GCATCGCAGGAGTTCCTAAAG                  | 504 bp              | 64 °C                             |

PCR was performed in a final volume of 20 µl containing approximately 20 ng of genomic DNA, 50 mM KCl, 10 mM Tris-HCl (pH 8.3), 1.5 mM MgCl<sub>2</sub>, 200 µM deoxyribonucleotide triphosphates (dNTPs), 1 unit of Qiagen (Valencia, CA) HotStar Taq polymerase, and 10 µM of each primer. Thermocycling (Applied Biosystems Inc., Foster City, CA) consisted of an initial denaturation at 95 °C for 15 min followed by 35 cycles of PCR. Each cycle of PCR consisted of denaturation at 94 °C for 60 s, annealing at 62-64 °C for 60 s and extension at 72 °C for 60 s. A final extension step of 10 min at 72 °C was added.
