# Supplementary material for: 25-Hydroxylase vitamin D deficiency in 27 Saudi Arabian subjects: a clinical and molecular report on CYP2R1 mutations
Source: PubMed Central journal article supplement — Endocr Connect. 2021 Jun 16;10(7):767–75. doi: 10.1530/EC-21-0102 (PMC8346186; doi:10.1530/ec-21-0102), 2021-06-16
Supplement: supplementary_table_2.pdf [file supplementary_table_2.pdf]

**Supplementary Table 2.** Patients' list; Clinical, biochemical, radiological and genetic data.

| Family | Patient | Personal data |                     | Presentation                                                                            |                |                         |                        |                     |                  |           |            |         |          |                 |           |            |         | Response to treatment | Type of Maintenance treatment | Genetic testing |                   |                          |
|--------|---------|---------------|---------------------|-----------------------------------------------------------------------------------------|----------------|-------------------------|------------------------|---------------------|------------------|-----------|------------|---------|----------|-----------------|-----------|------------|---------|-----------------------|-------------------------------|-----------------|-------------------|--------------------------|
|        |         | Gender        | Age of presentation | Clinical                                                                                |                | Radiology               |                        |                     | Biochemical      |           |            |         |          |                 |           |            |         |                       |                               |                 |                   |                          |
|        |         |               |                     | symptoms                                                                                | Height z score | Ricket x-ray            | DXA scan               | Renal US            | Before Treatment |           |            |         |          | After Treatment |           |            |         |                       |                               |                 |                   |                          |
|        |         |               |                     |                                                                                         |                |                         |                        |                     | 25(OH)D nmol/L   | Ca mmol/l | Po4 mmol/L | ALP U/L | PTH ng/L | 25(OH)D nmol/L  | Ca mmol/l | Po4 mmol/L | ALP U/L |                       |                               |                 | PTH ng/L          |                          |
| 1      | 1       | male          | 9                   | short stature<br>limitation of activity<br>bone pain<br>bone deformity<br>abnormal gait | -2.2           | Bowing rachitic roseroy |                        |                     |                  | 6         | 2.1        | 1.5     | 399      | 181             | 6         | 2.2        | 1.5     | 95.6                  | 53.7                          | no              | Needs active form | Homozygous c.768 ins T   |
|        | 2       | female        | 6                   | short stature<br>limitation of activity<br>bone pain<br>bone deformity<br>abnormal gait | -2             | rickets                 |                        |                     |                  | 6         | 2.3        | 1.6     | 331      | 128             | 7         | 2.3        | 1.5     | 135.7                 | 28                            | no              | Needs active form | Homozygous c.768 ins T   |
| 2      | 1       | female        | 8                   | short stature<br>limitation of activity<br>bone pain<br>bone deformity                  | -2.7           | osteopenia bowing       | mild osteopenia (-1.7) | no nephrocalcinosis |                  | 13        | 2.3        | 1.2     | 475      | 282             | 82        | 2.3        | 1       | 73                    | 35                            | yes             | 50,000 U/2w       | Homozygous c.367+1 G>A   |
|        | 2       | female        | 6                   | short stature<br>limitation of activity<br>bone pain<br>bone deformity<br>abnormal gait | -2.1           | rickets                 | normal                 | no nephrocalcinosis |                  | 13        | 2.4        | 1.9     | 447      | 523             | 81        | 2.3        | 1.14    | 69.5                  | 43.5                          | yes             | 50,000 U/w        | Heterozygous c.367+1 G>A |
| 3      | 1       | female        | 5 years             | short stature<br>limitation of activity<br>bone pain<br>bone deformity<br>numbness      | 153 cm         | Osteopenia bowing       | Osteopenia (-2.1)      | no nephrocalcinosis |                  | <5        | 1.7        | 1.6     | 356      | 312             | 86        | 2.2        | 1.2     | 55                    | 35                            | yes             | 50,000 U/w        | Homozygous c.367+1 G>A   |
|        | 2       | female        | <10 years           | bone pain                                                                               |                | normal                  |                        |                     |                  | 34        | 2.3        | 1.1     | 53       | 46.5            | 52        | 2.3        | 1.3     | 53                    | 31.9                          | yes             | 50,000 U/w        | Heterozygous c.367+1 G>A |

|   |   |        |           |                                                                             |        |                    |                      |                     |    |      |      |      |      |     |      |      |       |      |     |                   |                          |
|---|---|--------|-----------|-----------------------------------------------------------------------------|--------|--------------------|----------------------|---------------------|----|------|------|------|------|-----|------|------|-------|------|-----|-------------------|--------------------------|
|   | 3 | male   | 6 years   | bone pain                                                                   | 0.1    | normal             | normal               |                     | 37 | 2.3  | 1.8  | 311  | 55   | 72  | 2.4  | 1.3  | 211   | 44.7 | yes | 50,000 U/m        | Heterozygous c.367+1 G>A |
|   | 4 | female | 2 years   | bone pain                                                                   | 0.4    | normal             |                      | no nephrocalcinosis | 39 | 2.4  | 1.5  | 186  | 31   | 99  | 2.4  | 1.4  | 160   | 22   | yes | 50,000 U/m        | Heterozygous c.367+1 G>A |
| 4 | 1 | male   | <10 years | bone pain                                                                   | 0.2    | none               | normal               |                     | 14 | 2.3  | 1.8  | 363  | 81   | 31  | 2.2  | 1.9  | 336   | 43   | no  | Needs active form | Homozygous c.768 ins T   |
| 5 | 1 | female | 2 years   | short stature limitation of activity bone pain bone deformity abnormal gait | 129 cm | Osteopenia bowing  | Osteopenia (-2.5)    | no nephrocalcinosis | 18 | 2    | 0.9  | 165  | 90   | 105 | 2.2  | 1.1  | 75    | 86.4 | yes | 50,000 U/w        | Homozygous c.768 ins T   |
|   | 2 | female | <10 years | bone pain limitation of activity                                            |        | normal             |                      |                     | 10 | 2.3  | 1    | 81   | 101  | 86  | 2.3  | 0.9  | 67    | 45   | yes | 50,000 U/m        | Heterozygous c.768 ins T |
|   | 3 | female | <10 years | short stature limitation of activity bone pain                              | -1.2   | normal             | normal               | no nephrocalcinosis | 19 | 2.3  | 1.5  | 380  | 122  | 55  | 2.4  | 1.5  | 139.4 | 30   | yes | 50,000 U/ 2w      | Heterozygous c.768 ins T |
| 6 | 1 | male   | <10 years | bone pain                                                                   |        | none               |                      |                     | 21 | 2.2  | 1    | 102  | 65.8 | 52  | 2.2  | 1.25 | 109   | 45   | yes | 50,000 U/m        | Heterozygous c.768 ins T |
|   | 2 | male   | 4 years   | bone pain                                                                   | -0.5   | normal             |                      |                     | 14 | 2.15 | 1.75 | 265  | 91   | 111 | 2.35 | 2    | 251   | 50   | yes | 50,000 U/w        | Homozygous c.768 ins T   |
|   | 3 | male   | 3 years   | short stature limitation of activity bone pain                              | -1.9   | bowing             |                      | no nephrocalcinosis | 6  | 2.2  | 1.2  | 215  | 45   | 161 | 2.3  | 1.58 | 168   | 30   | yes | 50,000 U/w        | Homozygous c.768 ins T   |
| 7 | 1 | male   | <10 years | Limitation of activity bone pain muscle cramb                               | 176cm  | Rickets osteopenia | mild osteopenia (-1) | no nephrocalcinosis | 8  | 2.3  | 1.4  | 655  | 79   | 47  | 2.4  | 1.1  | 200   | 36   | no  | Needs active form | Homozygous c.768 ins T   |
|   | 2 | male   | 10 years  | Limitation of activity bone pain muscle cramb abnormal gait                 | 167cm  | Rickets osteopenia | mild osteopenia (-1) | no nephrocalcinosis | <5 | 1.6  | 1.4  | 1752 | 494  | 43  | 2.5  | 1.2  | 140   | 34   | no  | Needs active form | Homozygous c.768 ins T   |

|   |   |        |           |                                                                             |       |                    |        |  |    |     |      |      |      |     |     |     |     |    |     |              |                          |
|---|---|--------|-----------|-----------------------------------------------------------------------------|-------|--------------------|--------|--|----|-----|------|------|------|-----|-----|-----|-----|----|-----|--------------|--------------------------|
|   | 3 | male   | 7 years   | bone pain                                                                   | -1.2  | normal             | normal |  | 13 | 2.5 | 1.5  | 222  | 62.5 | 69  | 2.4 | 1.6 | 186 | 36 | yes | 50,000 U/w   | Homozygous c.768 ins T   |
|   | 4 | male   | 5 years   | bone pain                                                                   | -1    | normal             | normal |  | 25 | 2.5 | 1.4  | 260  | 44.6 | 58  | 2.5 | 1.4 | 216 | 28 | yes | 50,000 U/ 2w | Homozygous c.768 ins T   |
|   | 5 | male   | <10 years | short stature limitation of activity                                        | 165cm | rickets            |        |  | 19 | 2.6 | 1.7  | 178  |      | 74  | 2.3 | 1.3 | 27  |    | yes | 50,000 U/m   | Heterozygous c.768 ins T |
|   | 6 | female | <10 years | Limitation of activity                                                      |       | none               |        |  | 18 | 2.5 | 1.4  | 98   | 101  | 67  | 2.3 | 1.2 | 56  | 68 | yes | 50,000 U/m   | Heterozygous c.768 ins T |
| 8 | 1 | female | 6 years   | Limitation of activity bone pain bone deformity abnormal gait               | -0.66 | Rickets osteopenia |        |  | 16 | 2.2 | 1.1  | 817  | 154  | 86  | 2.2 | 1.9 | 81  | 42 | yes | 50,000 U/ 2w | Homozygous c.367+1 G>A   |
| 9 | 1 | female | <10 years | bone pain                                                                   | -1.7  | none               |        |  | 13 | 2.2 | 1.1  | 645  | 161  | 130 | 2.6 | 1.5 | 282 | 40 | yes | 50,000 U/ m  | Homozygous c.367+1 G>A   |
|   | 2 | female | 3 years   | Limitation of activity bone pain bone deformity muscle cramps abnormal gait | -0.8  | Rickets osteopenia |        |  | 9  | 1.8 | 1    | 753  | 339  | 59  | 2.3 | 1.3 | 120 | 69 | yes | 50,000 U/ m  | Homozygous c.367+1 G>A   |
|   | 3 | female | 5 years   | short stature limitation of activity bone pain                              | -1.7  | none               |        |  | <5 | 1.5 | 1.2  | 488  | 316  | 98  | 2.1 | 1.7 | 210 | 46 | yes | 50,000 U/ m  | Homozygous c.367+1 G>A   |
|   | 4 | female | 5 years   | short stature limitation of activity bone pain                              | -1.7  | none               |        |  | <5 | 1.9 | 0.85 | 2963 | 542  | 70  | 2.2 | 1.4 | 382 | 94 | yes | 50,000 U/ m  | Homozygous c.367+1 G>A   |
|   | 5 | female | <10 years | bone pain short stature limitation of activity                              | 148cm | osteopenia         |        |  | 13 | 2.2 | 0.55 | 134  | 104  | 49  | 2.3 | 1.1 | 118 | 80 | yes | 50,000 U/w   | Homozygous c.367+1 G>A   |
